# Supplementary material for: Spina bifida-predisposing heterozygous mutations in Planar Cell Polarity genes and Zic2 reduce bone mass in young mice
Source: PubMed Central journal article supplement (PMC5820290; doi:10.1038/s41598-018-21718-x), 2018-02-20
Supplement: 41598_2018_21718_MOESM1_ESM.pdf [file 41598_2018_21718_MOESM1_ESM.pdf]

# **Spina bifida-predisposing heterozygous mutations in Planar Cell Polarity genes and Zic2 reduce bone mass in young mice**

Isabel R Orriss<sup>1</sup>, Stuart Lanham<sup>2</sup>, Dawn Savery<sup>3</sup>, Nicholas DE Greene<sup>3</sup>, Philip Stanier<sup>3</sup>,  
Richard Oreffo<sup>2</sup>, Andrew J Copp<sup>3</sup>, Gabriel L Galea<sup>3,#</sup>

1. Department of Comparative Biomedical Sciences, Royal Veterinary College, Camden, London, NW1 0TU, UK

2. Bone and Joint Research Group, Centre for Human Development, Stem Cells and Regeneration, Human Development and Health, Institute of Developmental Sciences, Faculty of Medicine, University of Southampton, Southampton, SO16 6YD, UK

3. Developmental Biology of Birth Defects, UCL GOS Institute of Child Health, 30 Guilford Street, London, WC1N 1EH, UK

# Corresponding author: Developmental Biology of Birth Defects, Wellcome Building W2.02, UCL GOS Institute of Child Health, 30 Guilford Street, London, WC1N 1EH, UK.

Email: [g.galea@ucl.ac.uk](mailto:g.galea@ucl.ac.uk)

## **Keywords:**

Bone, planar cell polarity, Vangl2, Celsr1, Zic2

**Supplementary Figures and Legends:**

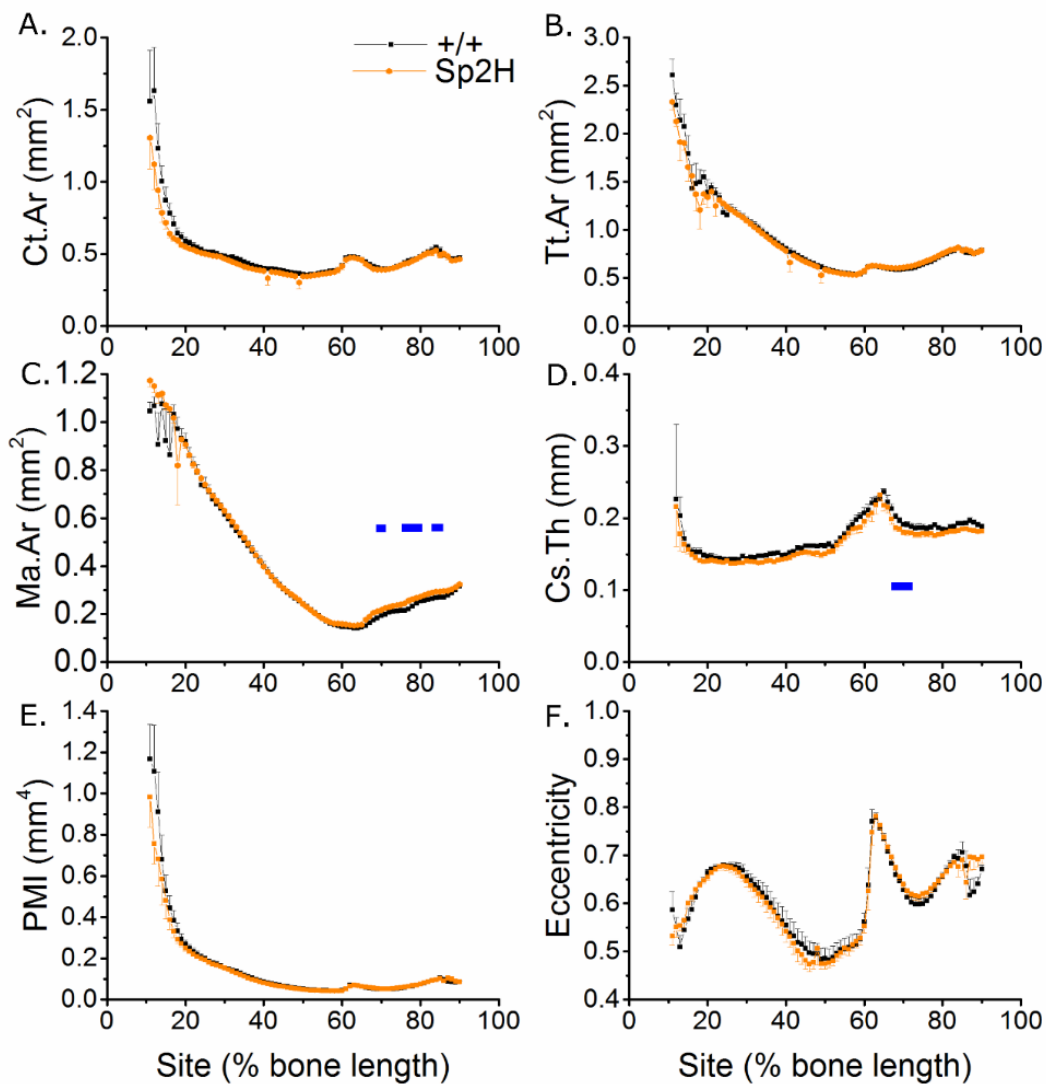

**Supplementary Figure S1: Heterozygous *Spotch* mutation of *Pax3* is associated with regionally smaller cortical bone mass in the tibia of young male mice.** SSA  $\mu$ CT analysis of cortical bone structure at each 1% site along the bone's length in 3-week-old male  $Pax3^{+/+}$  and  $Pax3^{Sp2H/+}$  littermates ( $n = 8$  each). A) Ct.Ar, B) Tt.Ar, C) Ma.Ar, D) Cs.Th, E) PMI and F) eccentricity were quantified. Blue lines indicate regions of significant differences between genotypes by mixed model analysis with Bonferroni post-hoc.

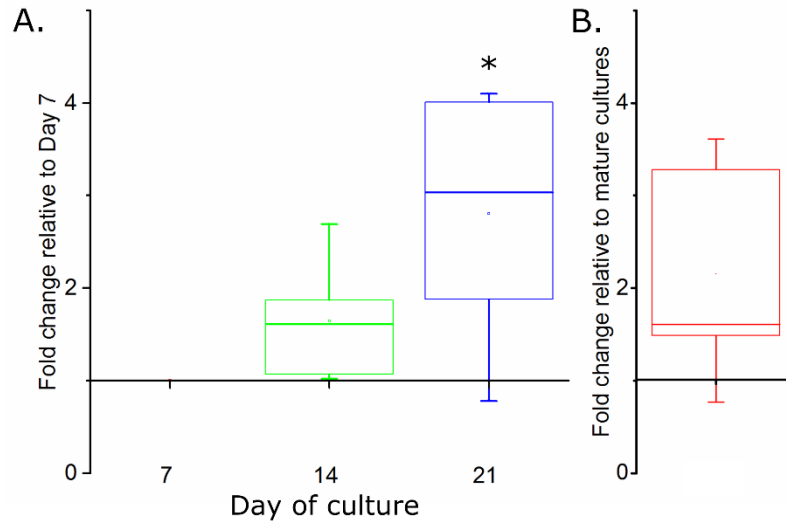

**Supplementary Figure S2: Zic2 expression increases in mineralising osteoblasts.** A,B) qRT-PCR quantification of Zic2 mRNA expression was quantified in (A) osteoblasts cultured for 7, 14 or 21 days and their expression compared to 7 day cultures (set at 1 for each set of cultures) or (B) mature resorbing osteoclasts (day 9 after 2 days of medium acidification) versus mature osteoclasts (day 7). N = 5-6, \* p < 0.05

Supplementary Table S1: Trabecular bone parameters in *Vangl2 Lp* heterozygous mice and WT littermates

|                | Body weight (g) | Tibial length (mm) | BV/TV (%)    | Tb.Th (mm)   | Tb.Sp (mm) | Tb.N (/mm)   | Tb.Pf (/mm)  | SMI          |
|----------------|-----------------|--------------------|--------------|--------------|------------|--------------|--------------|--------------|
| WT Mean        | 12.825          | 13.872             | 12.787       | 0.064        | 0.494      | 2.000        | 13.186       | 1.889        |
| SEM            | 0.496           | 0.129              | 0.932        | 0.002        | 0.025      | 0.114        | 1.512        | 0.062        |
| Lp/+ Mean      | 12.575          | 13.726             | 8.306        | 0.058        | 0.499      | 1.417        | 20.731       | 2.243        |
| SEM            | 0.297           | 0.103              | 0.982        | 0.002        | 0.025      | 0.153        | 1.505        | 0.060        |
|                |                 |                    |              |              |            |              |              |              |
| T-test p value | 0.672           | 0.406              | <b>0.007</b> | <b>0.033</b> | 0.895      | <b>0.012</b> | <b>0.005</b> | <b>0.002</b> |

Supplementary Table S2: Trabecular bone parameters in *Celsr1 Crsh* heterozygous mice and WT littermates

|                | Body weight (g) | Tibial length (mm) | BV/TV (%)    | Tb.Th (mm)   | Tb.Sp (mm) | Tb.N (/mm) | Tb.Pf (/mm)  | SMI          |
|----------------|-----------------|--------------------|--------------|--------------|------------|------------|--------------|--------------|
| WT Mean        | 11.538          | 13.350             | 18.216       | 0.071        | 0.430      | 2.572      | 10.775       | 1.861        |
| SEM            | 0.235           | 0.095              | 0.882        | 0.002        | 0.017      | 0.087      | 0.991        | 0.036        |
| Crsh/+ Mean    | 10.775          | 13.240             | 12.914       | 0.061        | 0.398      | 2.083      | 19.396       | 2.229        |
| SEM            | 0.313           | 0.089              | 1.651        | 0.002        | 0.027      | 0.208      | 1.575        | 0.074        |
|                |                 |                    |              |              |            |            |              |              |
| T-test p value | 0.082           | 0.396              | <b>0.047</b> | <b>0.019</b> | 0.320      | 0.128      | <b>0.002</b> | <b>0.002</b> |

Supplementary Table S3: Trabecular bone parameters in *Pax3 Sp2H* heterozygous mice and WT littermates

|                | Body weight (g) | Tibial length (mm) | BV/TV (%) | Tb.Th (mm) | Tb.Sp (mm) | Tb.N (/mm) | Tb.Pf (/mm) | SMI   |
|----------------|-----------------|--------------------|-----------|------------|------------|------------|-------------|-------|
| WT Mean        | 9.913           | 13.002             | 10.570    | 0.056      | 0.426      | 1.878      | 21.797      | 2.255 |
| SEM            | 0.280           | 0.088              | 0.868     | 0.001      | 0.028      | 0.144      | 1.223       | 0.046 |
| Sp2H/+ Mean    | 9.713           | 13.031             | 10.400    | 0.056      | 0.445      | 1.867      | 20.228      | 2.151 |
| SEM            | 0.237           | 0.053              | 0.498     | 0.001      | 0.017      | 0.075      | 1.260       | 0.054 |
|                |                 |                    |           |            |            |            |             |       |
| T-test p value | 0.594           | 0.781              | 0.868     | 0.814      | 0.571      | 0.948      | 0.386       | 0.270 |

**Supplementary Table S4: Trabecular bone parameters in *Zic2* *Ku* heterozygous mice and WT littermates**

|                       | Body weight (g) | Tibial length (mm) | BV/TV (%) | Tb.Th (mm) | Tb.Sp (mm) | Tb.N (/mm) | Tb.Pf (/mm) | SMI   |
|-----------------------|-----------------|--------------------|-----------|------------|------------|------------|-------------|-------|
| <b>WT Mean</b>        | 9.200           | 12.995             | 15.853    | 0.056      | 0.311      | 2.772      | 15.224      | 1.943 |
| <b>SEM</b>            | 0.482           | 0.274              | 1.843     | 0.002      | 0.021      | 0.239      | 2.892       | 0.114 |
| <b>Ku/+ Mean</b>      | 8.338           | 12.385             | 14.475    | 0.055      | 0.315      | 2.667      | 17.321      | 2.021 |
| <b>SEM</b>            | 0.384           | 0.426              | 1.201     | 0.003      | 0.024      | 0.179      | 2.225       | 0.064 |
|                       |                 |                    |           |            |            |            |             |       |
| <b>T-test p value</b> | 0.184           | 0.248              | 0.541     | 0.680      | 0.909      | 0.731      | 0.575       | 0.559 |

**Supplementary Table S5: List of NTD-associated genes with "bone", "osteoblast" or "osteoblast" associated functional ontologies.**

Msx2  
 Dlx5  
 Men1  
 Ptch1  
 Smad5  
 Gli3  
 Ski  
 Rab23  
 BMP7  
 BMP2  
 Nog  
 Nf1  
 Pitx2  
 Rarg  
 Rara  
 Csk  
 Fgfr1

Abi1  
Abl1  
Ptpn11  
Lrp6  
Twist1  
Gja1  
Cited2  
Prkaca  
Msx1  
Tfap2a  
Frem1  
Tulp3  
Hdac4  
T  
Ctnnbip1  
Sfrp2  
Wnt3a  
Sfrp1  
Cthrc1  
Adar  
Asf1a  
Map3k7  
Mapk8  
Csnk1a1  
Chuk  
Trp53  
Traf6  
Rac1  
Mapk9
